# Supplementary material
Source: ML conference proceedings conference paper supplement (https://openreview.net/forum?id=LI1n_od-aEq)
Supplement: supplementary_material [file attachment]

**Question:** What halftime performer previously headlined Super Bowl XLVIII ?  
**Predicted Answer:** Beyoncé and Bruno Mars

L0 ... The Super Bowl 50 halftime show was headlined by the British rock group Coldplay with special guest performers Beyoncé and Bruno Mars , who headlined the Super Bowl XLVII and Super Bowl XLVIII halftime shows , respectively ...

L1 ... The Super Bowl 50 halftime show was headlined by the British rock group Coldplay with special guest performers Beyoncé and Bruno Mars , who headlined the Super Bowl XLVII and Super Bowl XLVIII halftime shows , respectively ...

L2 ... The Super Bowl 50 halftime show was headlined by the British rock group Coldplay with special guest performers Beyoncé and Bruno Mars , who headlined the Super Bowl XLVII and Super Bowl XLVIII halftime shows , respectively ...

L3 ... The Super Bowl 50 halftime show was headlined by the British rock group Coldplay with special guest performers Beyoncé and Bruno Mars , who headlined the Super Bowl XLVII and Super Bowl XLVIII halftime shows , respectively ...

L9 ... The Super Bowl 50 halftime show was headlined by the British rock group Coldplay with special guest performers Beyoncé and Bruno Mars , who headlined the Super Bowl XLVII and Super Bowl XLVIII halftime shows , respectively ...

L10 ... The Super Bowl 50 halftime show was headlined by the British rock group Coldplay with special guest performers Beyoncé and Bruno Mars , who headlined the Super Bowl XLVII and Super Bowl XLVIII halftime shows , respectively ...

L11 ... The Super Bowl 50 halftime show was headlined by the British rock group Coldplay with special guest performers Beyoncé and Bruno Mars , who headlined the Super Bowl XLVII and Super Bowl XLVIII halftime shows , respectively ...

L12 ... The Super Bowl 50 halftime show was headlined by the British rock group Coldplay with special guest performers Beyoncé and Bruno Mars , who headlined the Super Bowl XLVII and Super Bowl XLVIII halftime shows , respectively ...
