# Supplementary material
Source: ML conference proceedings conference paper supplement (https://openreview.net/forum?id=LI1n_od-aEq)
Supplement: supplementary_material [file attachment]

**Question:** Who does Goku pine for ?

**Predicted Answer:**

|                                                                                |                                                                             |
|--------------------------------------------------------------------------------|-----------------------------------------------------------------------------|
| ... average teen Goku ( Justin Chatwin ) , who breaks from his                 | ... average teen Goku ( Justin Chatwin ) , who breaks from his              |
| <b>L0</b> wholesale pining for classmate Chi - Chi ( Jamie Chung ) to that hes | <b>L9</b> wholesale pining for classmate Chi - Chi ( Jamie Chung ) to that  |
| at the center of an intergalactic search for the ...                           | hes at the center of an intergalactic search for the ...                    |
| ... average teen Goku ( Justin Chatwin ) , who breaks from his                 | ... average teen Goku ( Justin Chatwin ) , who breaks from his              |
| <b>L1</b> wholesale pining for classmate Chi - Chi ( Jamie Chung ) to that hes | <b>L10</b> wholesale pining for classmate Chi - Chi ( Jamie Chung ) to that |
| at the center of an intergalactic search for the ...                           | hes at the center of an intergalactic search for the ...                    |
| ... average teen Goku ( Justin Chatwin ) , who breaks from his                 | ... average teen Goku ( Justin Chatwin ) , who breaks from his              |
| <b>L2</b> wholesale pining for classmate Chi - Chi ( Jamie Chung ) to that hes | <b>L11</b> wholesale pining for classmate Chi - Chi ( Jamie Chung ) to that |
| at the center of an intergalactic search for the ...                           | hes at the center of an intergalactic search for the ...                    |
| ... average teen Goku ( Justin Chatwin ) , who breaks from his                 | ... average teen Goku ( Justin Chatwin ) , who breaks from his              |
| <b>L3</b> wholesale pining for classmate Chi - Chi ( Jamie Chung ) to that hes | <b>L12</b> wholesale pining for classmate Chi - Chi ( Jamie Chung ) to that |
| at the center of an intergalactic search for the ...                           | hes at the center of an intergalactic search for the ...                    |
