# Supplementary material
Source: ML conference proceedings conference paper supplement (https://openreview.net/forum?id=LI1n_od-aEq)
Supplement: supplementary_material [file attachment]

**Question:** What percentage was the increase of agricultural products in 2003 - 04 ?

**Predicted Answer:** 17 %

|    |                                                                                                                                                                                                   |     |                                                                                                                                                                                                   |
|----|---------------------------------------------------------------------------------------------------------------------------------------------------------------------------------------------------|-----|---------------------------------------------------------------------------------------------------------------------------------------------------------------------------------------------------|
| L0 | During 2003 – 04 , the gross value of Victorian agricultural production increased by 17 % to \$ 8 . 7 billion . This represented 24 % of national agricultural production total gross value . ... | L9  | During 2003 – 04 , the gross value of Victorian agricultural production increased by 17 % to \$ 8 . 7 billion . This represented 24 % of national agricultural production total gross value . ... |
| L1 | During 2003 – 04 , the gross value of Victorian agricultural production increased by 17 % to \$ 8 . 7 billion . This represented 24 % of national agricultural production total gross value . ... | L10 | During 2003 – 04 , the gross value of Victorian agricultural production increased by 17 % to \$ 8 . 7 billion . This represented 24 % of national agricultural production total gross value . ... |
| L2 | During 2003 – 04 , the gross value of Victorian agricultural production increased by 17 % to \$ 8 . 7 billion . This represented 24 % of national agricultural production total gross value . ... | L11 | During 2003 – 04 , the gross value of Victorian agricultural production increased by 17 % to \$ 8 . 7 billion . This represented 24 % of national agricultural production total gross value . ... |
| L3 | During 2003 – 04 , the gross value of Victorian agricultural production increased by 17 % to \$ 8 . 7 billion . This represented 24 % of national agricultural production total gross value . ... | L12 | During 2003 – 04 , the gross value of Victorian agricultural production increased by 17 % to \$ 8 . 7 billion . This represented 24 % of national agricultural production total gross value . ... |
