# Supplementary material
Source: ML conference proceedings conference paper supplement (https://openreview.net/forum?id=LI1n_od-aEq)
Supplement: supplementary_material [file attachment]

**Question:** How did Waring Hudsucker die ?  
**Predicted Answer:**

L0 ... Meanwhile , the company ' s founder and president , Waring Hudsucker ( Charles Durning ) , unexpectedly commits suicide during a business meeting by jumping out of a top - floor window ...

L1 ... Meanwhile , the company ' s founder and president , Waring Hudsucker ( Charles Durning ) , unexpectedly commits suicide during a business meeting by jumping out of a top - floor window ...

L2 ... Meanwhile , the company ' s founder and president , Waring Hudsucker ( Charles Durning ) , unexpectedly commits suicide during a business meeting by jumping out of a top - floor window ...

L3 ... Meanwhile , the company ' s founder and president , Waring Hudsucker ( Charles Durning ) , unexpectedly commits suicide during a business meeting by jumping out of a top - floor window ...

L9 ... Meanwhile , the company ' s founder and president , Waring Hudsucker ( Charles Durning ) , unexpectedly commits suicide during a business meeting by jumping out of a top - floor window ...

L10 ... Meanwhile , the company ' s founder and president , Waring Hudsucker ( Charles Durning ) , unexpectedly commits suicide during a business meeting by jumping out of a top - floor window ...

L11 ... Meanwhile , the company ' s founder and president , Waring Hudsucker ( Charles Durning ) , unexpectedly commits suicide during a business meeting by jumping out of a top - floor window ...

L12 .. Meanwhile , the company ' s founder and president , Waring Hudsucker ( Charles Durning ) , unexpectedly commits suicide during a business meeting by jumping out of a top - floor window ...
