# Supplementary material
Source: ML conference proceedings conference paper supplement (https://openreview.net/forum?id=LI1n_od-aEq)
Supplement: supplementary_material [file attachment]

# BERT - DuoRC Integrated Gradients JSD

## Top 10 Removed

|    |      |      |      |      |      |      |      |      |      |      |      |      |      |
|----|------|------|------|------|------|------|------|------|------|------|------|------|------|
| 0  | 0.00 | 0.11 | 0.12 | 0.14 | 0.14 | 0.16 | 0.16 | 0.18 | 0.17 | 0.18 | 0.17 | 0.17 | 0.20 |
| 1  | 0.11 | 0.00 | 0.13 | 0.14 | 0.15 | 0.17 | 0.17 | 0.18 | 0.18 | 0.19 | 0.19 | 0.19 | 0.22 |
| 2  | 0.12 | 0.13 | 0.00 | 0.13 | 0.14 | 0.16 | 0.16 | 0.18 | 0.18 | 0.20 | 0.19 | 0.21 | 0.23 |
| 3  | 0.14 | 0.14 | 0.13 | 0.00 | 0.12 | 0.15 | 0.15 | 0.17 | 0.17 | 0.20 | 0.20 | 0.21 | 0.23 |
| 4  | 0.14 | 0.15 | 0.14 | 0.12 | 0.00 | 0.12 | 0.12 | 0.15 | 0.16 | 0.18 | 0.18 | 0.19 | 0.22 |
| 5  | 0.16 | 0.17 | 0.16 | 0.15 | 0.12 | 0.00 | 0.11 | 0.14 | 0.16 | 0.19 | 0.20 | 0.21 | 0.24 |
| 6  | 0.16 | 0.17 | 0.16 | 0.15 | 0.12 | 0.11 | 0.00 | 0.11 | 0.13 | 0.17 | 0.17 | 0.19 | 0.22 |
| 7  | 0.18 | 0.18 | 0.18 | 0.17 | 0.15 | 0.14 | 0.11 | 0.00 | 0.11 | 0.15 | 0.17 | 0.19 | 0.22 |
| 8  | 0.17 | 0.18 | 0.18 | 0.17 | 0.16 | 0.16 | 0.13 | 0.11 | 0.00 | 0.10 | 0.12 | 0.14 | 0.17 |
| 9  | 0.18 | 0.19 | 0.20 | 0.20 | 0.18 | 0.19 | 0.17 | 0.15 | 0.10 | 0.00 | 0.10 | 0.13 | 0.15 |
| 10 | 0.17 | 0.19 | 0.19 | 0.20 | 0.18 | 0.20 | 0.17 | 0.17 | 0.12 | 0.10 | 0.00 | 0.07 | 0.11 |
| 11 | 0.17 | 0.19 | 0.21 | 0.21 | 0.19 | 0.21 | 0.19 | 0.19 | 0.14 | 0.13 | 0.07 | 0.00 | 0.08 |
| 12 | 0.20 | 0.22 | 0.23 | 0.23 | 0.22 | 0.24 | 0.22 | 0.22 | 0.17 | 0.15 | 0.11 | 0.08 | 0.00 |
|    | 0    | 1    | 2    | 3    | 4    | 5    | 6    | 7    | 8    | 9    | 10   | 11   | 12   |
