# Supplementary material
Source: ML conference proceedings conference paper supplement (https://openreview.net/forum?id=LI1n_od-aEq)

BERT - DuoRC Integrated Gradients JSD  
Top 10 Retained

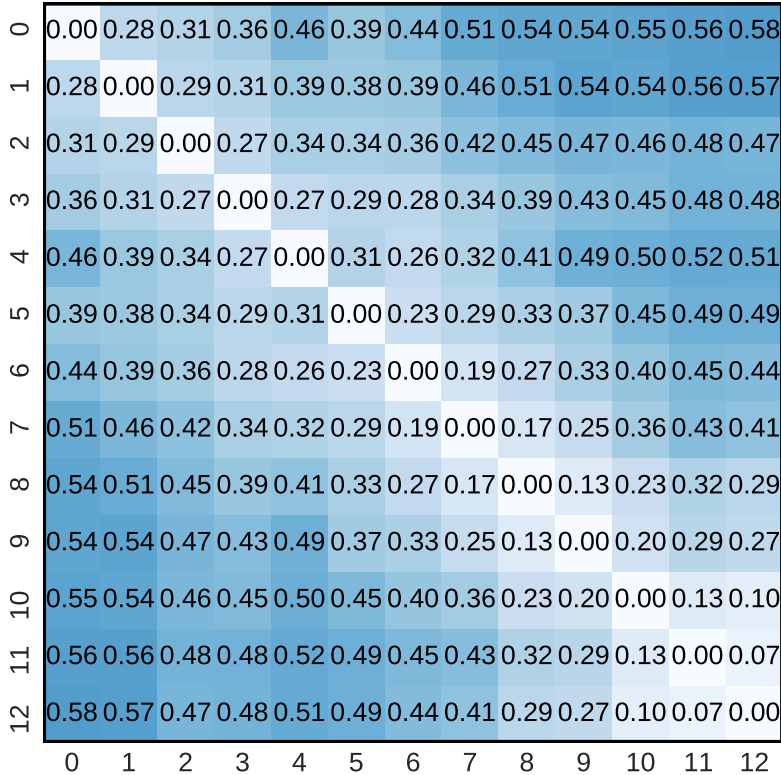

Supplement: supplementary_material [file attachment]

t-SNE representation  
for Question 10 and Layer 12

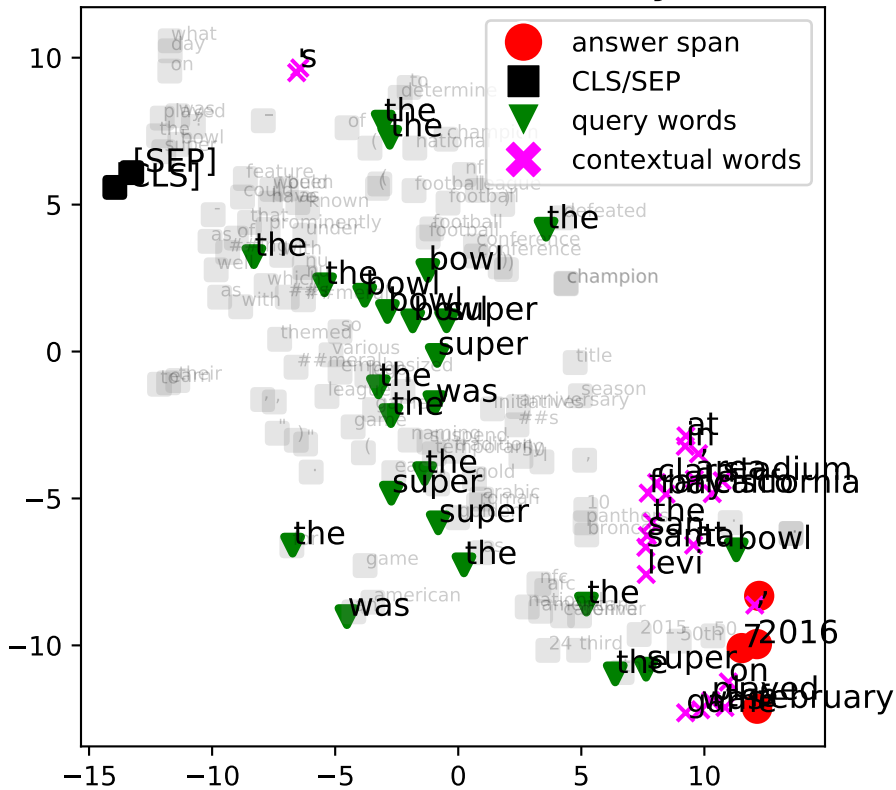

Supplement: supplementary_material [file attachment]

BERT - DuoRC Integrated Gradients JSD  
Top 5 Retained

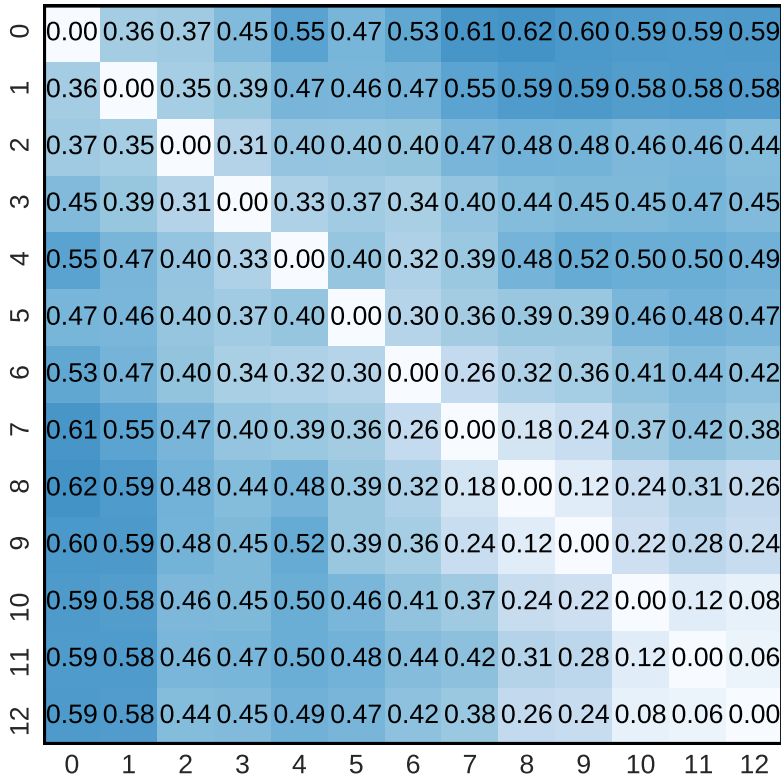

Supplement: supplementary_material [file attachment]

# BERT - SQuAD Integrated Gradients JSD Top 2 Removed

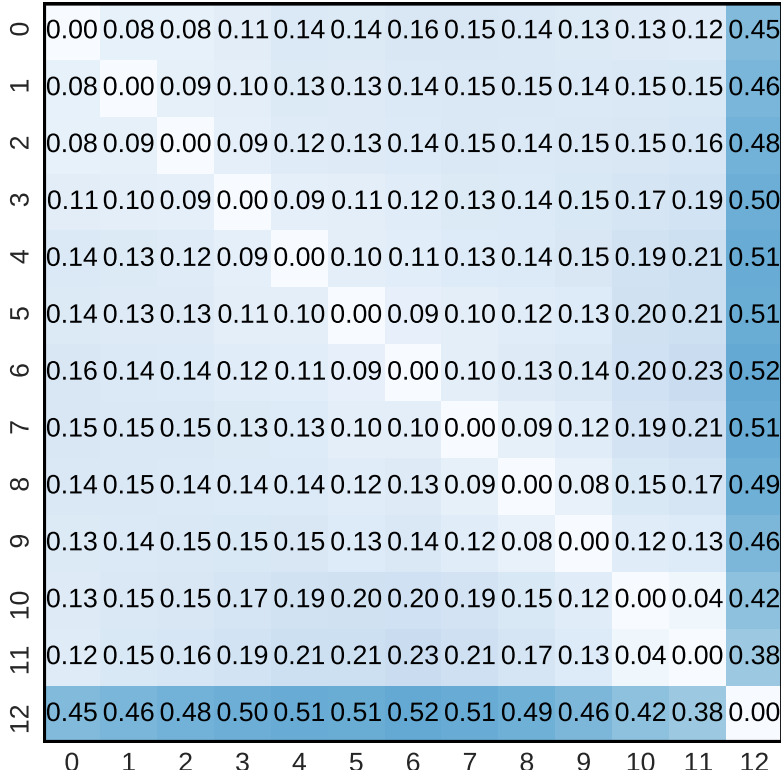

Supplement: supplementary_material [file attachment]

BERT - DuoRC Integrated Gradients JSD  
Top 2 Removed

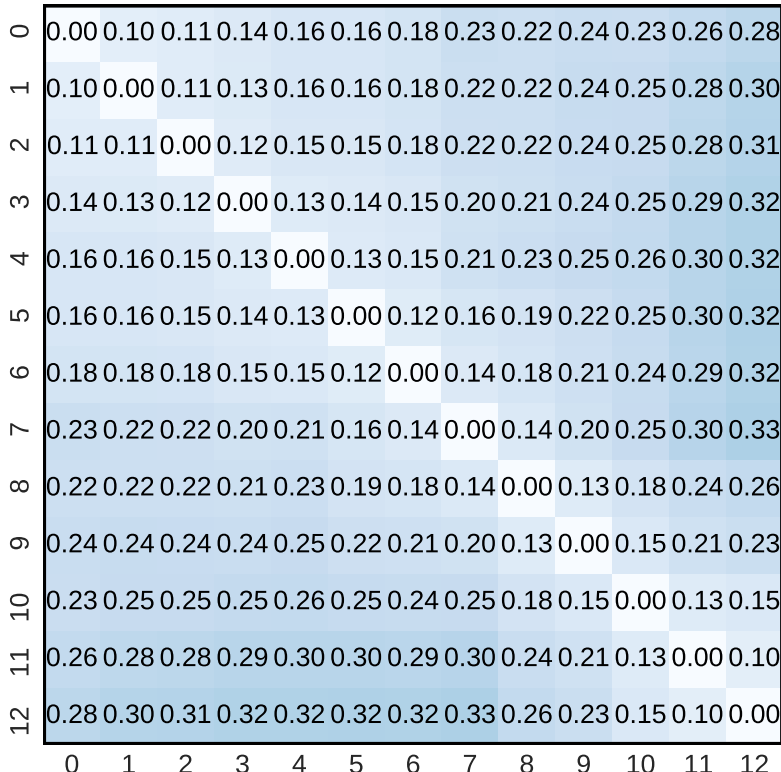

Supplement: supplementary_material [file attachment]

BERT - SQuAD Integrated Gradients JSD  
Top 10 Retained

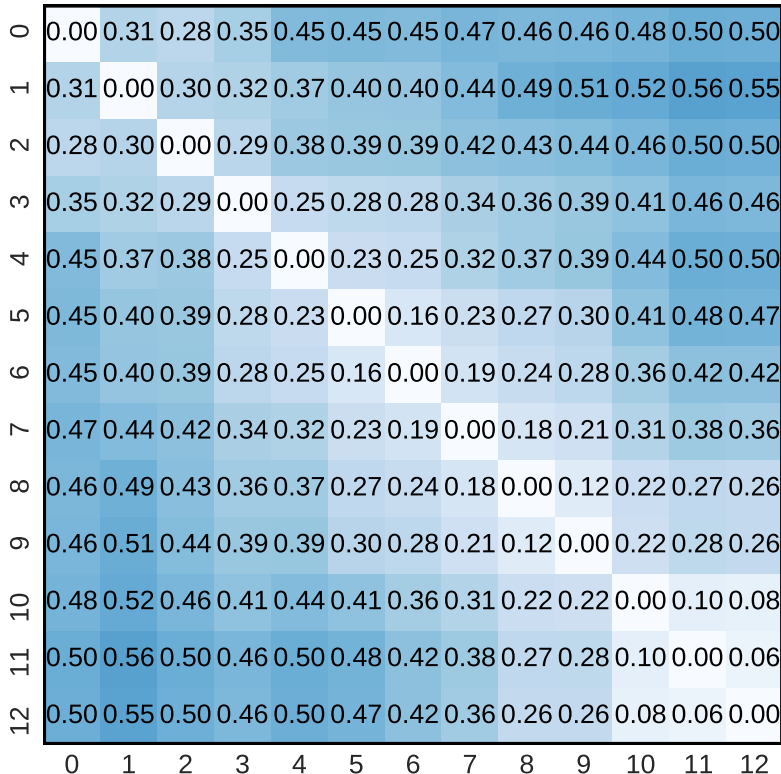

Supplement: supplementary_material [file attachment]

BERT - SQuAD Integrated Gradients JSD  
Top 5 Removed

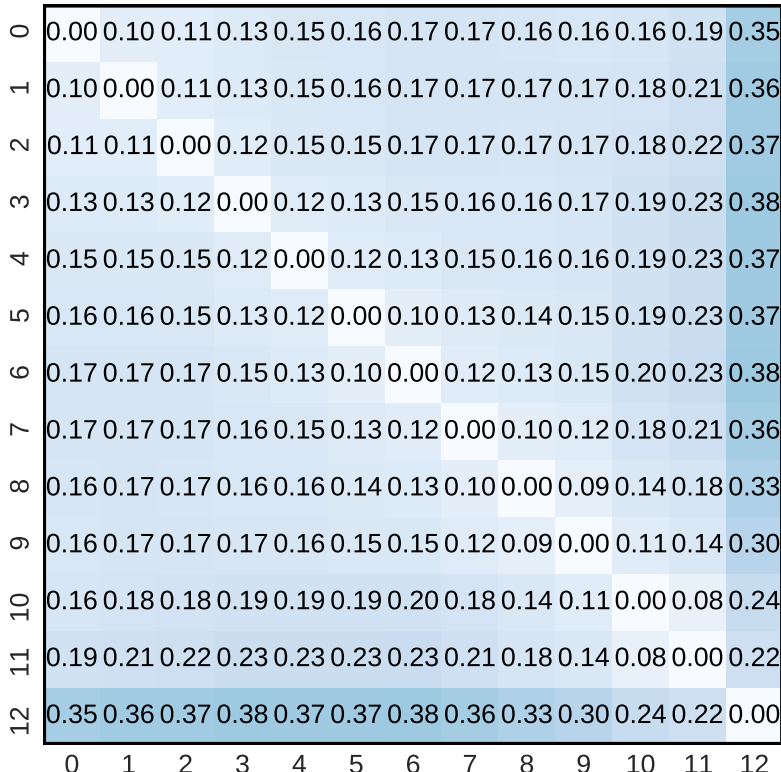

Supplement: supplementary_material [file attachment]

BERT - DuoRC Integrated Gradients JSD  
Top 2 Removed

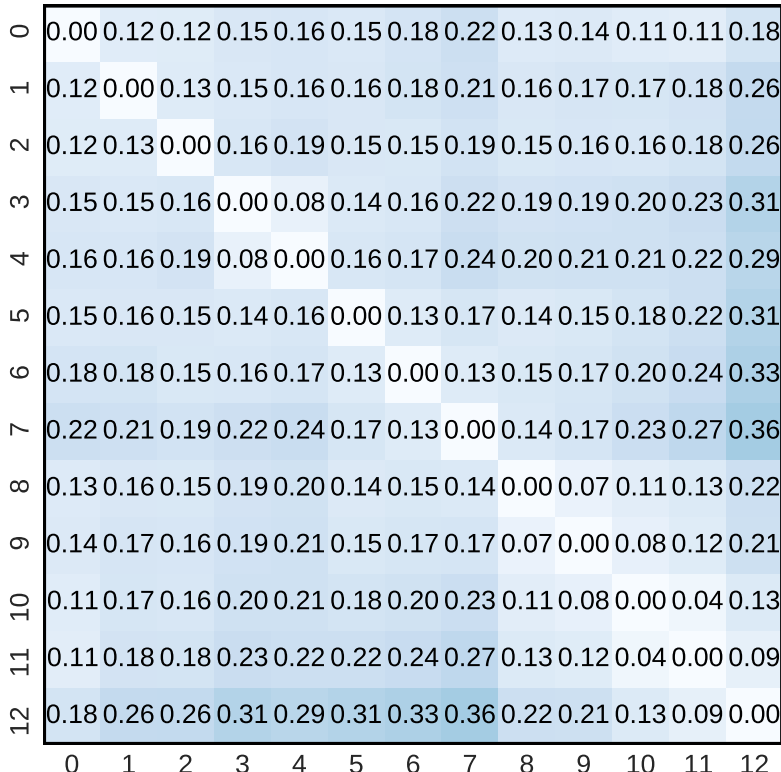

Supplement: supplementary_material [file attachment]

BERT - SQuAD Integrated Gradients JSD  
Top 2 Retained

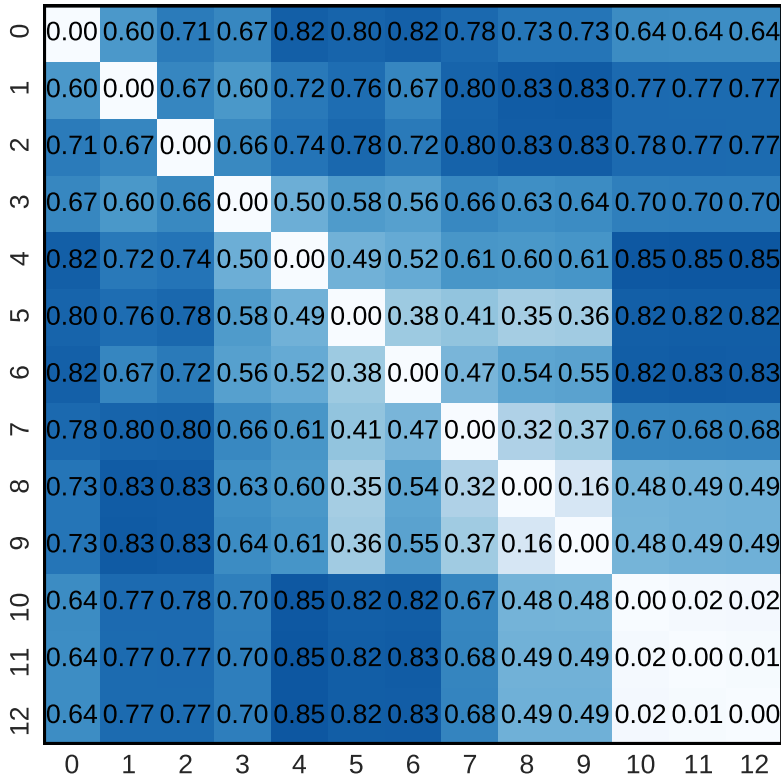

Supplement: supplementary_material [file attachment]

# BERT - SQuAD Integrated Gradients JSD

## Top 10 Removed

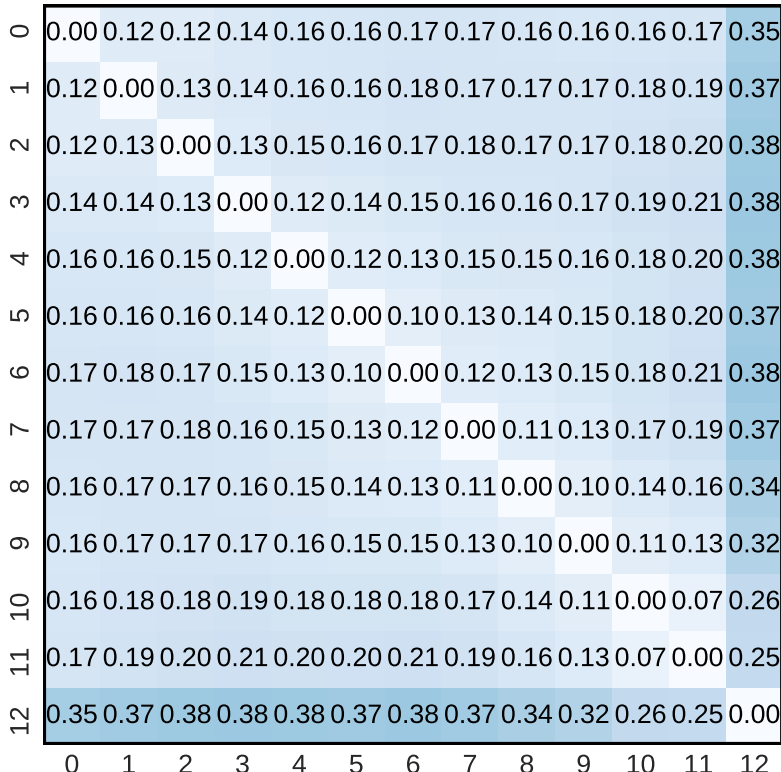

Supplement: supplementary_material [file attachment]

# BERT - DuoRC Integrated Gradients JSD

## Top 5 Removed

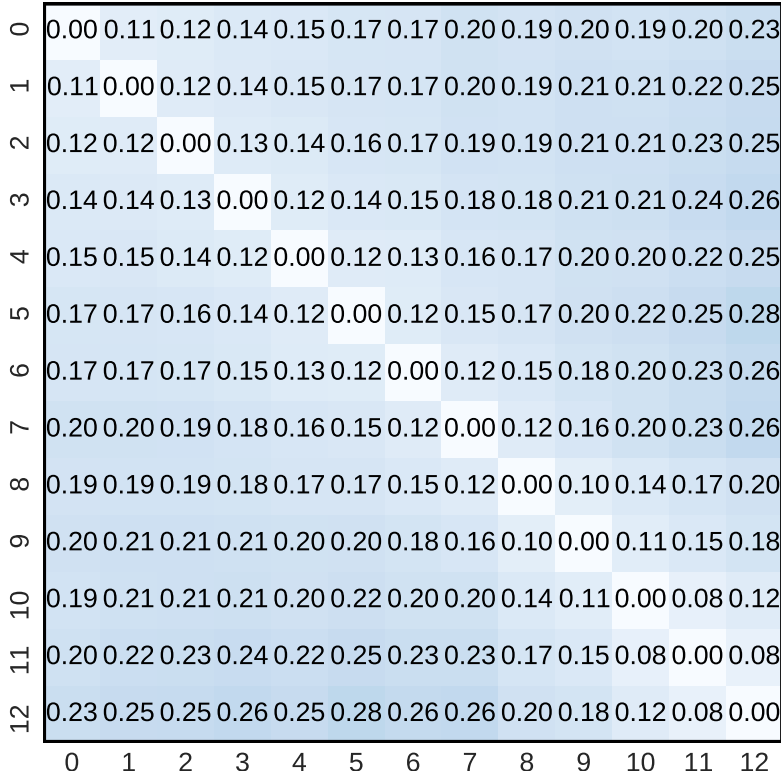

Supplement: supplementary_material [file attachment]

BERT - DuoRC Integrated Gradients JSD  
Top 2 Retained

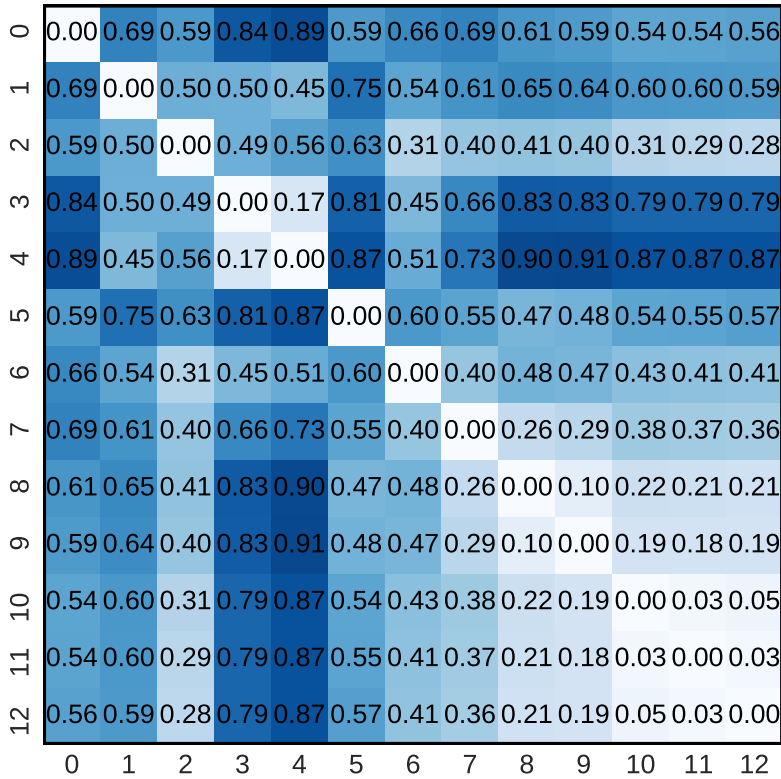

Supplement: supplementary_material [file attachment]

BERT - SQuAD Integrated Gradients JSD  
Top 2 Removed

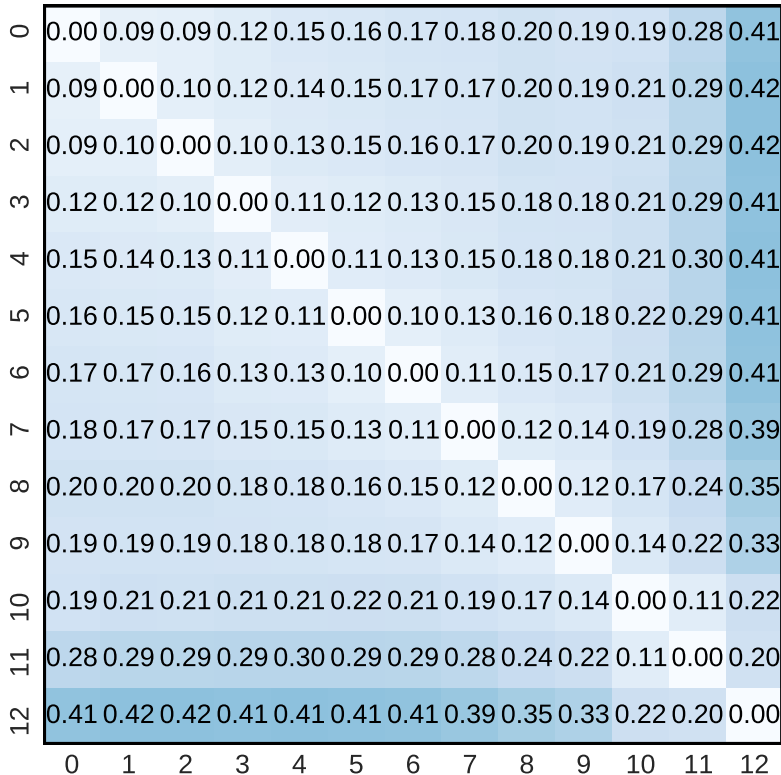

Supplement: supplementary_material [file attachment]

BERT - SQuAD Integrated Gradients JSD  
Top 5 Retained

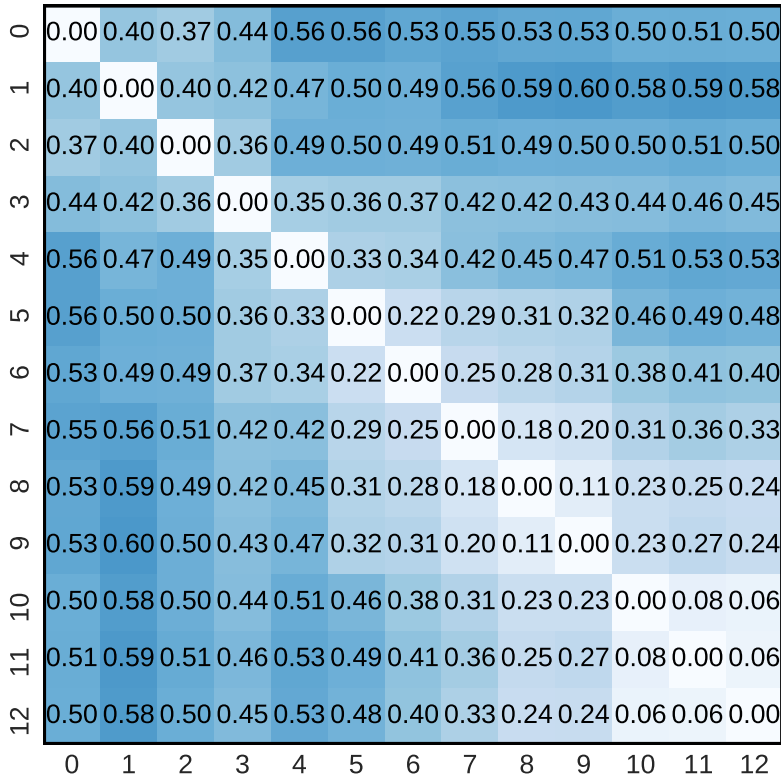

Supplement: supplementary_material [file attachment]

t-SNE representation  
for Question 10 and Layer 1

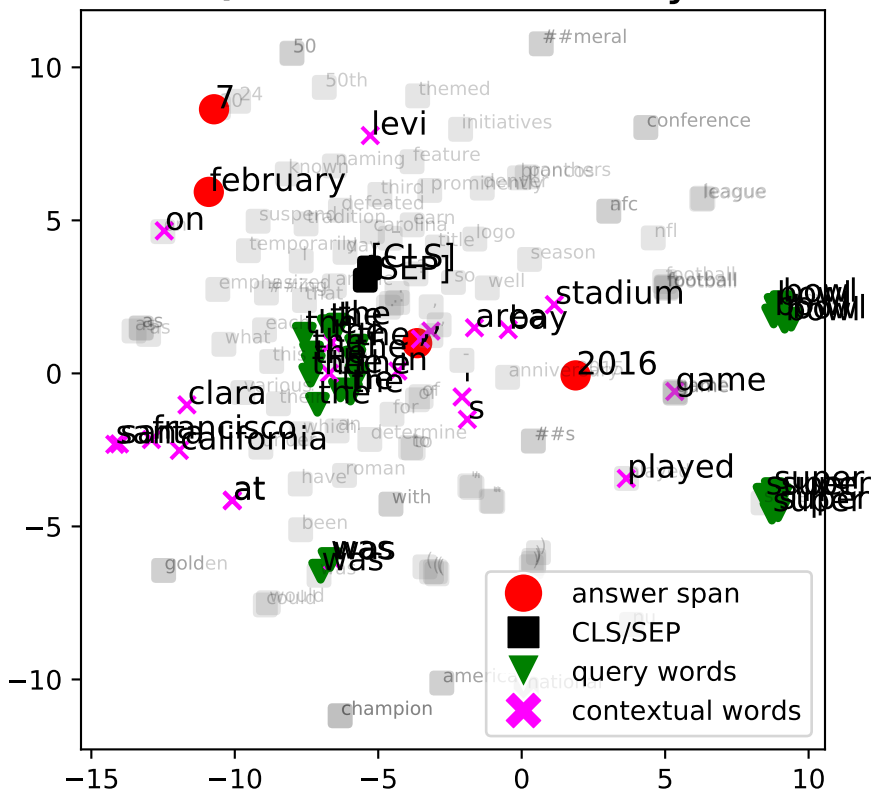

Supplement: supplementary_material [file attachment]

BERT - DuoRC Integrated Gradients JSD  
Top 2 Retained

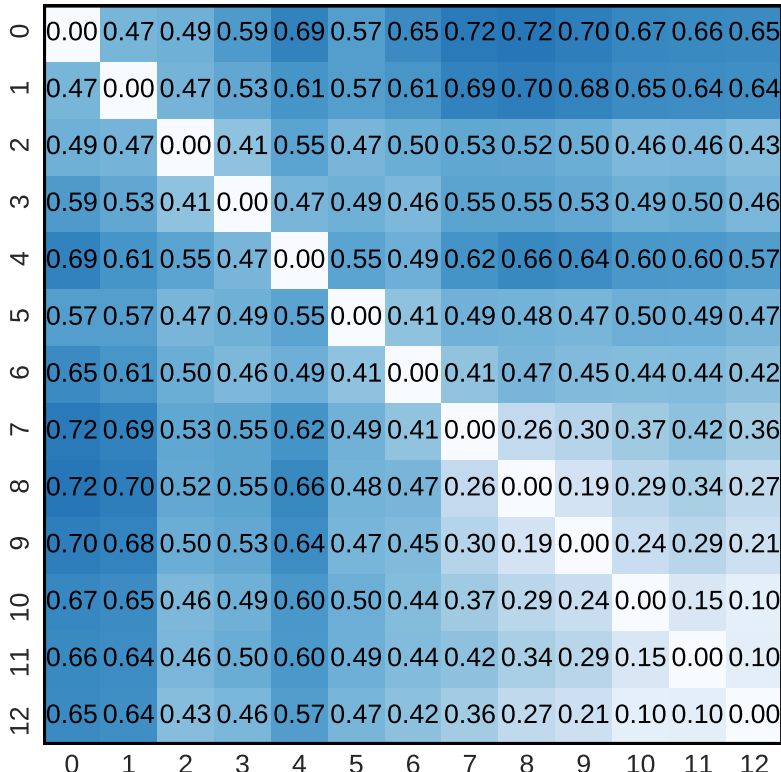

Supplement: supplementary_material [file attachment]

BERT - SQuAD Integrated Gradients JSD  
Top 2 Retained

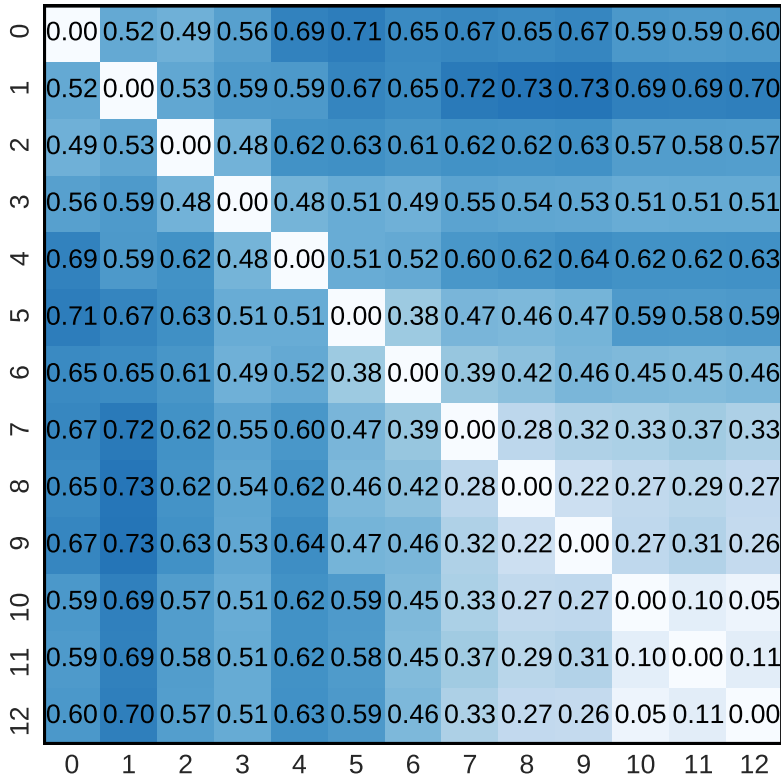

Supplement: supplementary_material [file attachment]

### t-SNE representation for Question 10 and Layer 10

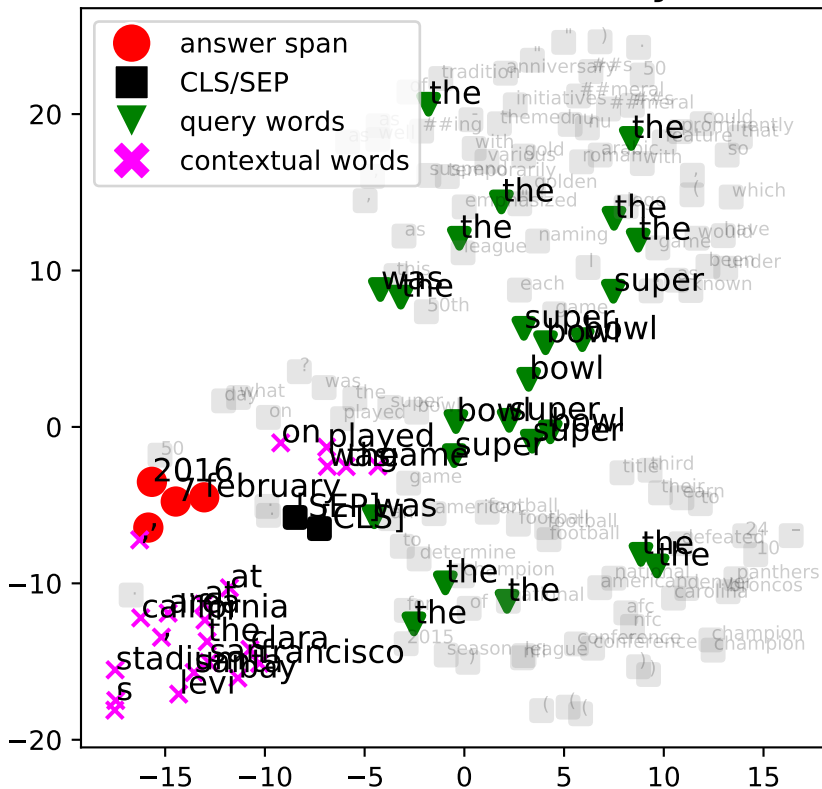

Supplement: supplementary_material [file attachment]
